# Supplementary material
Source: MDPI journal article supplement (https://www.mdpi.com/1424-8247/14/6/505)
Supplement: s1 [file s1]

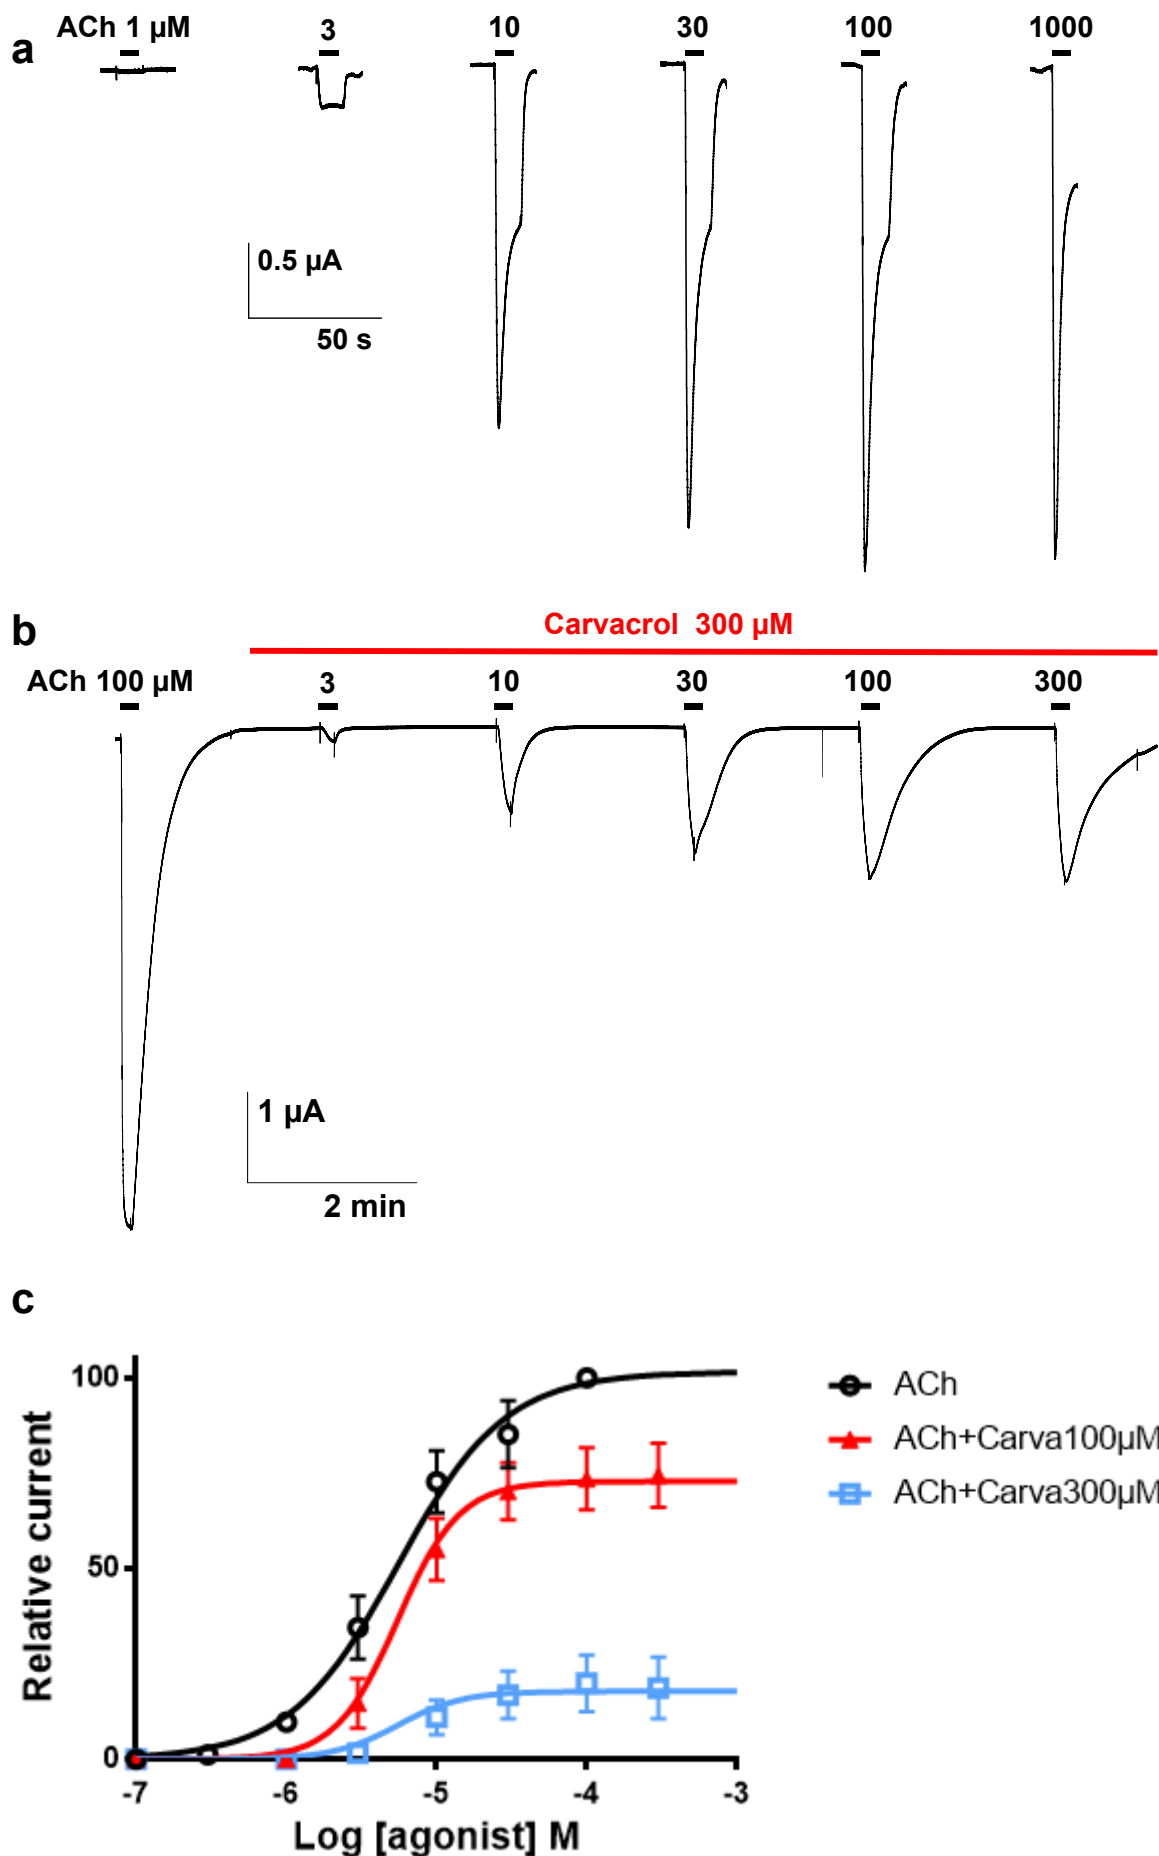

**Figure S1** Carvacrol effect on the acetylcholine concentration-response relationships for the *Ascaris suum* ACR-16 N-AChR expressed in *Xenopus* oocytes. **(a)** Recordings of ACh-evoked currents in absence of carvacrol; **(b)** Recordings of ACh-evoked currents in presence of 300  $\mu\text{M}$  carvacrol; **(c)** Concentration-response curves. All responses are normalized to 100  $\mu\text{M}$  ACh. Results are shown as the mean  $\pm$  se.

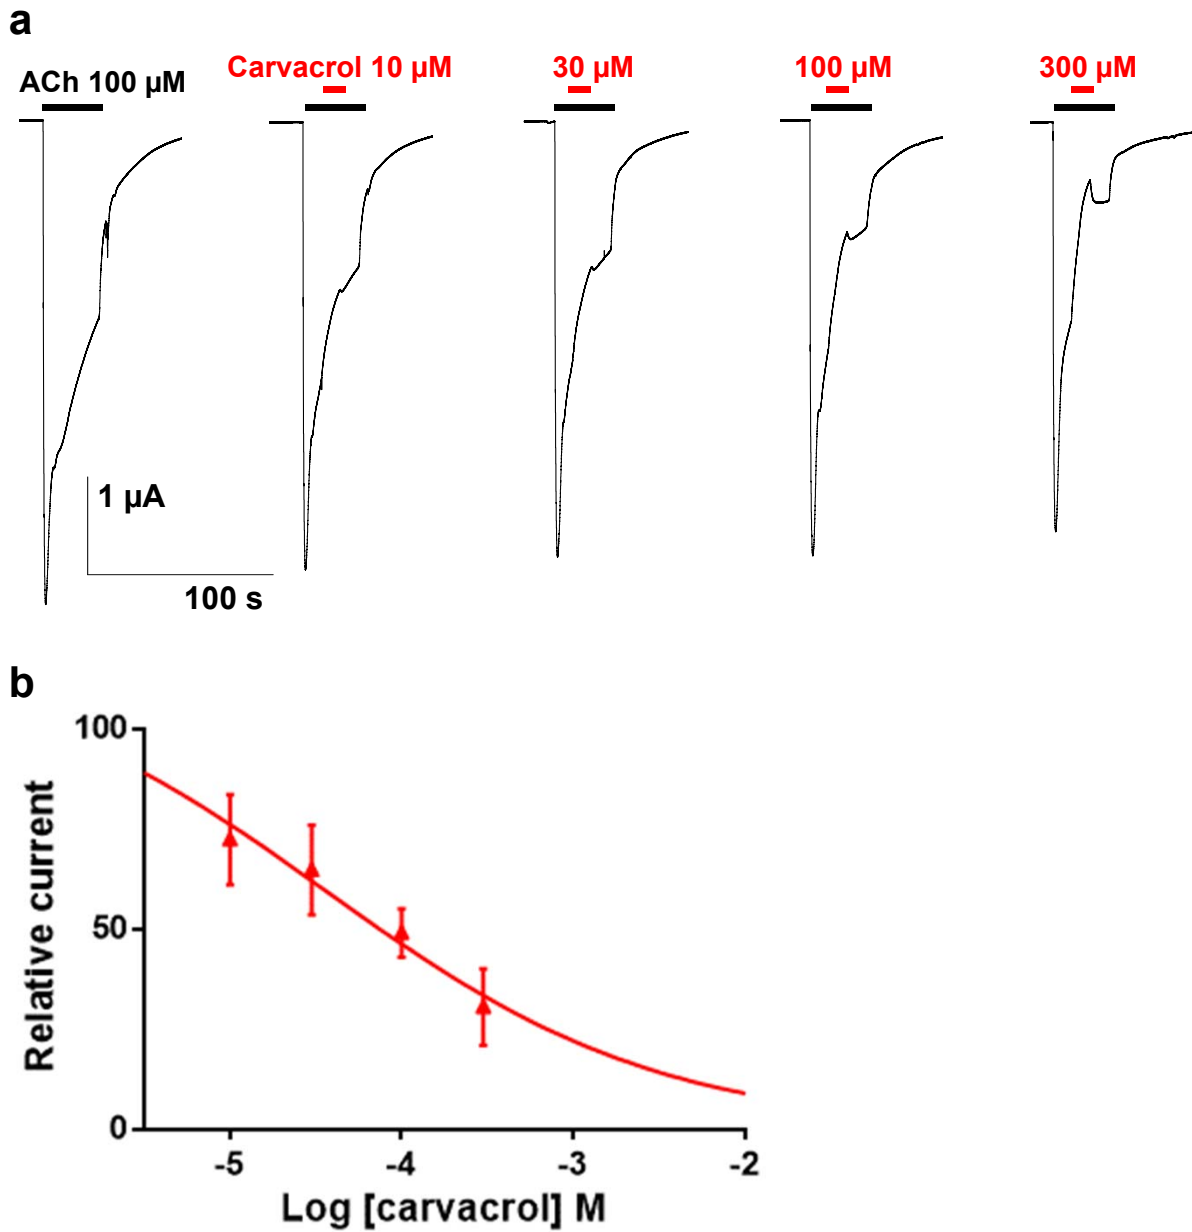

**Fig. S2** Concentration-inhibition relationship of carvacrol on the *A. suum* ACR-16 N-AChR expressed in *Xenopus* oocytes. (a) Representative current traces for single oocytes challenged with acetylcholine (ACh) in the presence of increasing concentrations of carvacrol. The concentrations of ACh and carvacrol ( $\mu$ M) are indicated above each trace; (b) Concentration-inhibition response curves of carvacrol. All responses are normalized to 100  $\mu$ M ACh. Results are shown as the mean  $\pm$  se.
